# Supplementary material
Source: Springer Nature journal article supplement (https://www.springermedizin.de/resource/supplementary/12891_2007_594_MOESM4_ESM.pdf/9506296)

### Ankle Joint Moment of Force

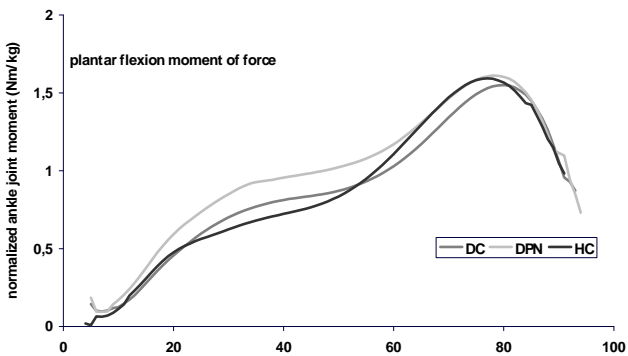

### Knee Joint Moment of Force

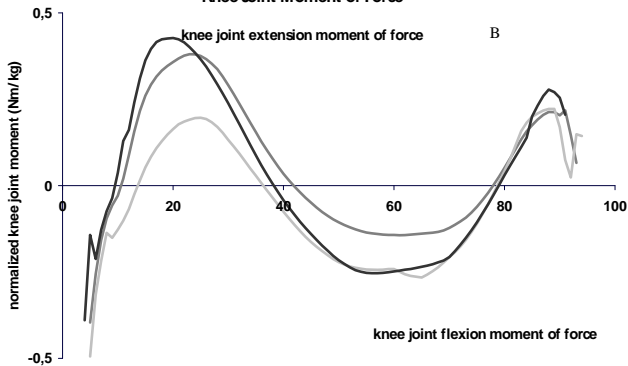

### Hip Joint Moment of Force

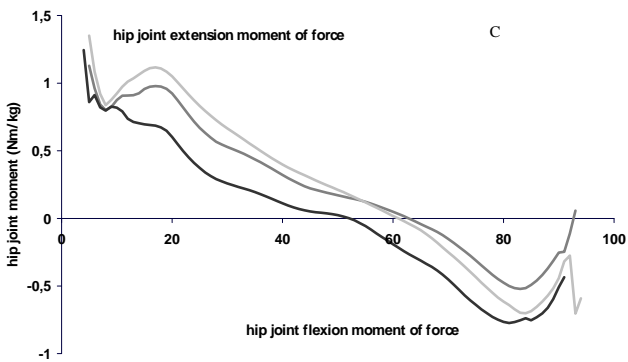

### Support Moment of Force

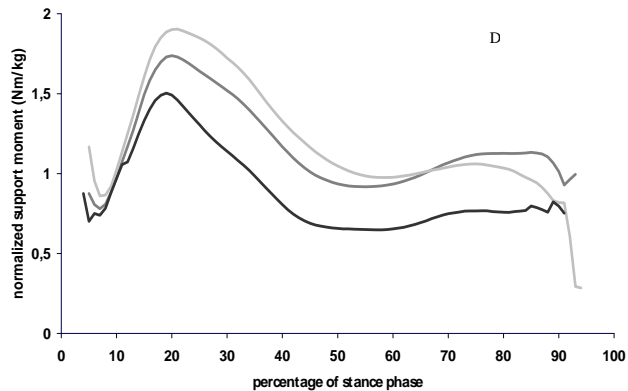

Supplement: MOESM4 [file 9506296]
